# Supplementary material for: Intrinsically stretchable naphthalenediimide–bithiophene conjugated statistical terpolymers using branched conjugation break spacers for field–effect transistors
Source: Royal Society of Chemistry journal article supplement (doi:10.1039/d1py01154e), 2021-01-01
Supplement: d1py01154e1.pdf [file d1py01154e1.pdf]

## Supporting Information

### **Intrinsically Stretchable Naphthalenediimide–Bithiophene Conjugated Statistical Terpolymers Using Branched Conjugation Break Spacers for Field–Effect Transistors**

*Yan-Cheng Lin,<sup>a,b,†</sup> Megumi Matsuda,<sup>c,†</sup> Kei-ichiro Sato,<sup>c</sup> Chun-Kai Chen,<sup>a</sup> Wei-Chen Yang,<sup>a</sup> Chu-Chen Chueh,<sup>a,b,\*</sup> Tomoya Higashihara,<sup>c,\*</sup> and Wen-Chang Chen<sup>a,b,\*</sup>*

<sup>a</sup> Department of Chemical Engineering, National Taiwan University, Taipei 10617, Taiwan

<sup>b</sup> Advanced Research Center for Green Materials Science and Technology, National Taiwan University, Taipei 10617, Taiwan

<sup>c</sup> Department of Organic Materials Science, Graduate School of Organic Materials Science, Yamagata University, 4-3-16 Jonan, Yonezawa, Yamagata 992-8510, Japan

\*Corresponding authors. E-mail: [cchueh@ntu.edu.tw](mailto:cchueh@ntu.edu.tw); [thigashihara@yz.yamagata-u.ac.jp](mailto:thigashihara@yz.yamagata-u.ac.jp); [chenwc@ntu.edu.tw](mailto:chenwc@ntu.edu.tw)

<sup>†</sup>Y.C. L. and M. M. equally contributed to this study as the co-1st authors.

KEYWORDS. N-type conjugated polymer; conjugation break spacer; intrinsic stretchability; statistical terpolymers; field-effect transistor

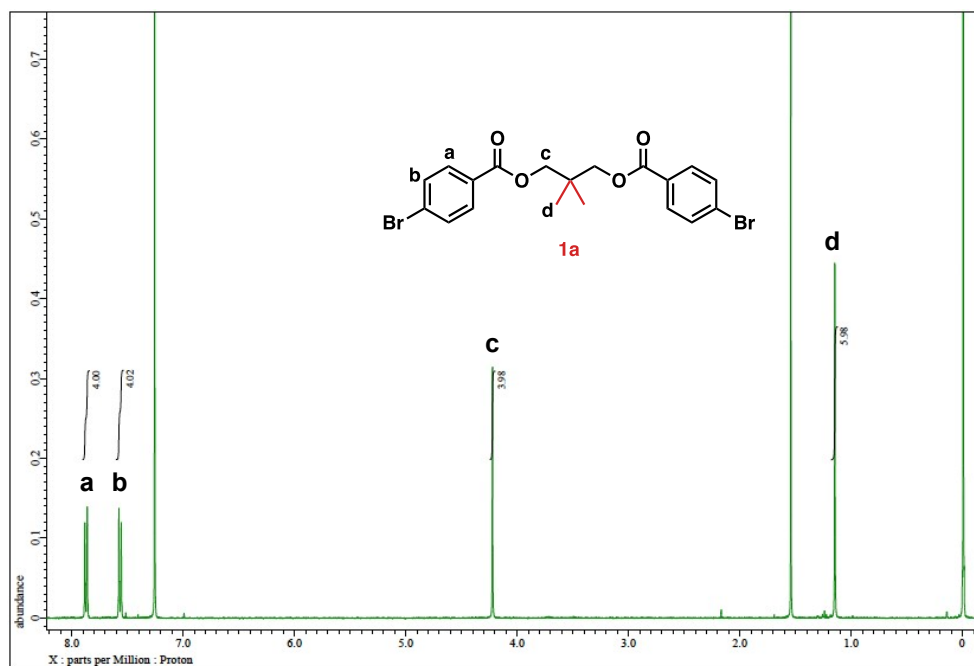**Fig. S1.**  $^1\text{H}$  NMR spectrum of **1a**.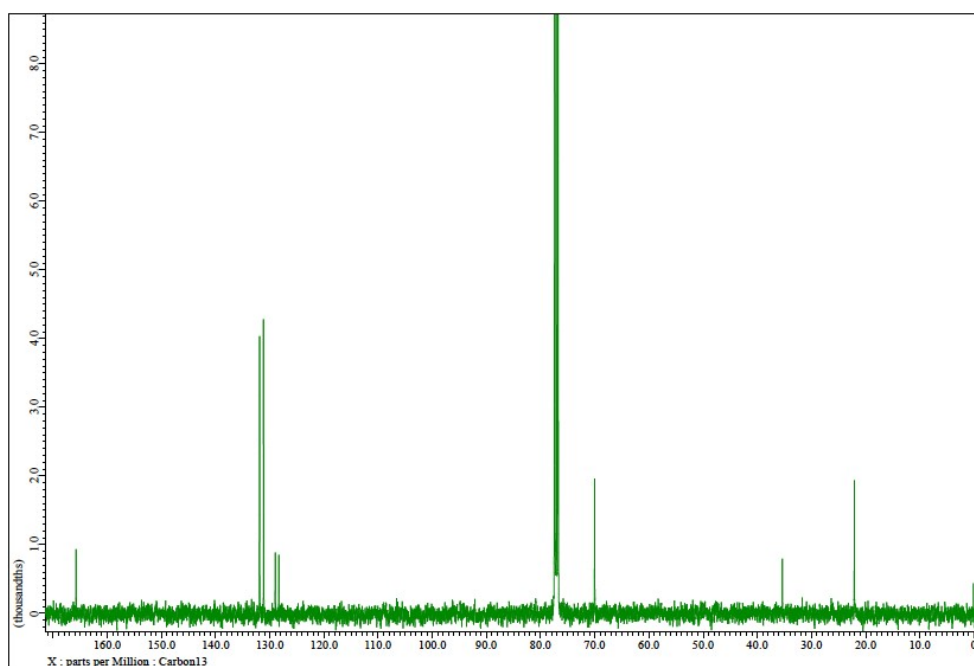**Fig. S2.**  $^{13}\text{C}$  NMR spectrum of **1a**.

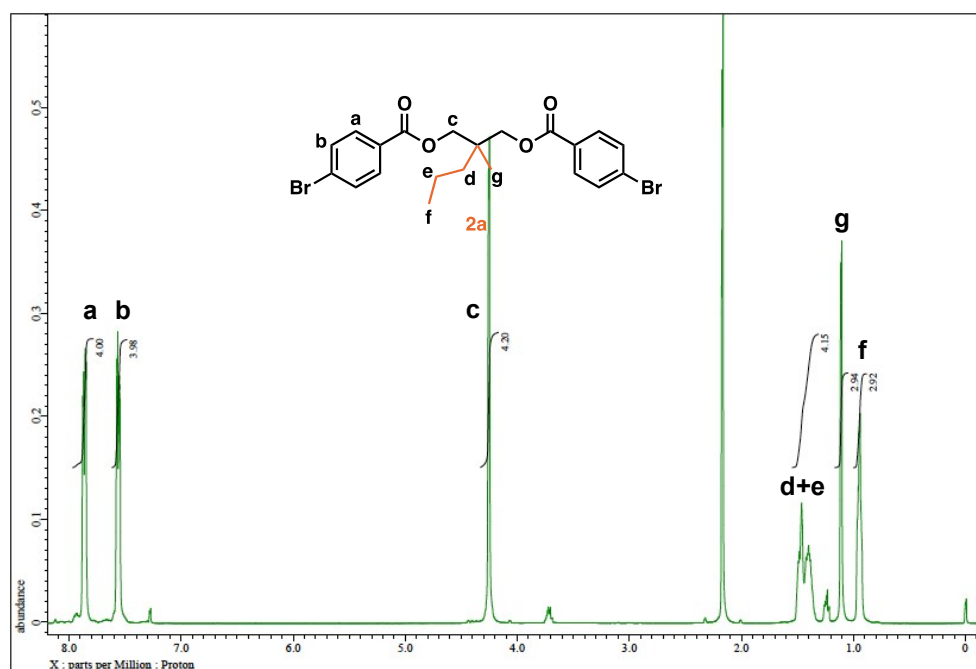

Fig. S3.  $^1\text{H}$  NMR spectrum of **2a**.

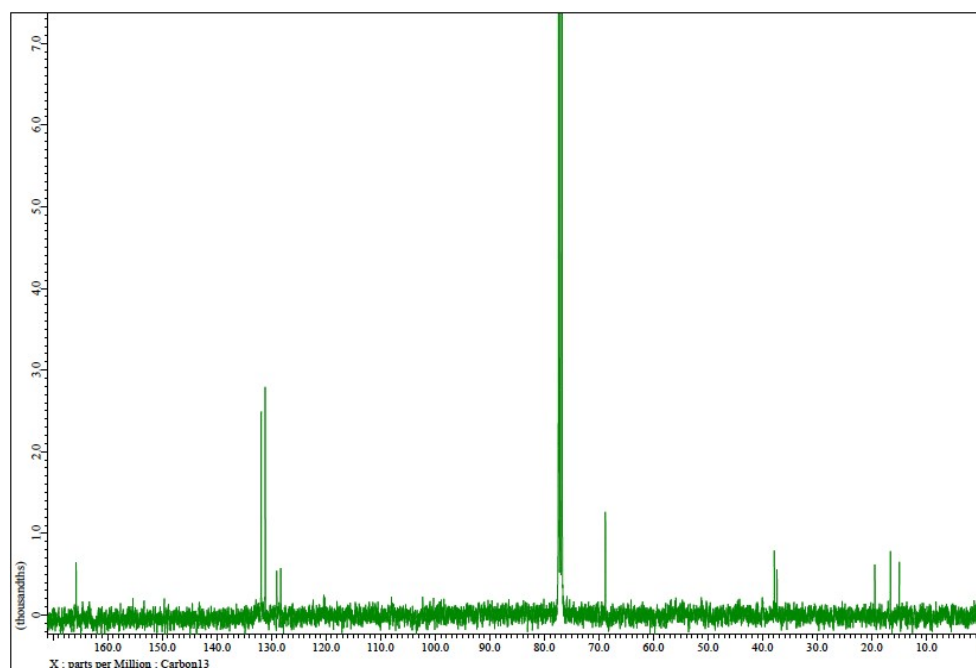

Fig. S4.  $^{13}\text{C}$  NMR spectrum of **2a**.

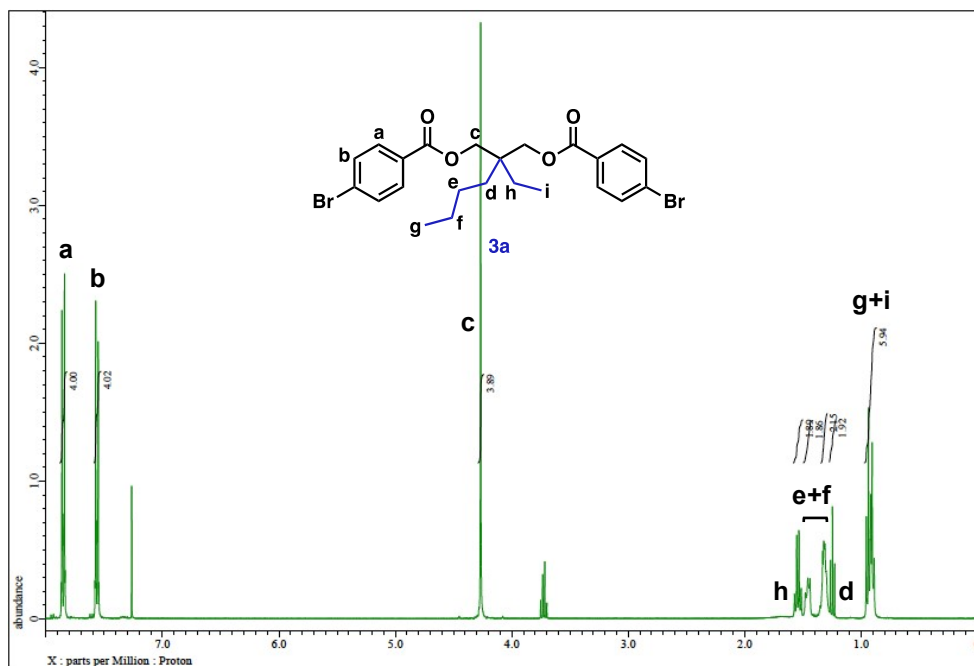

Fig. S5.  $^1\text{H}$  NMR spectrum of 3a.

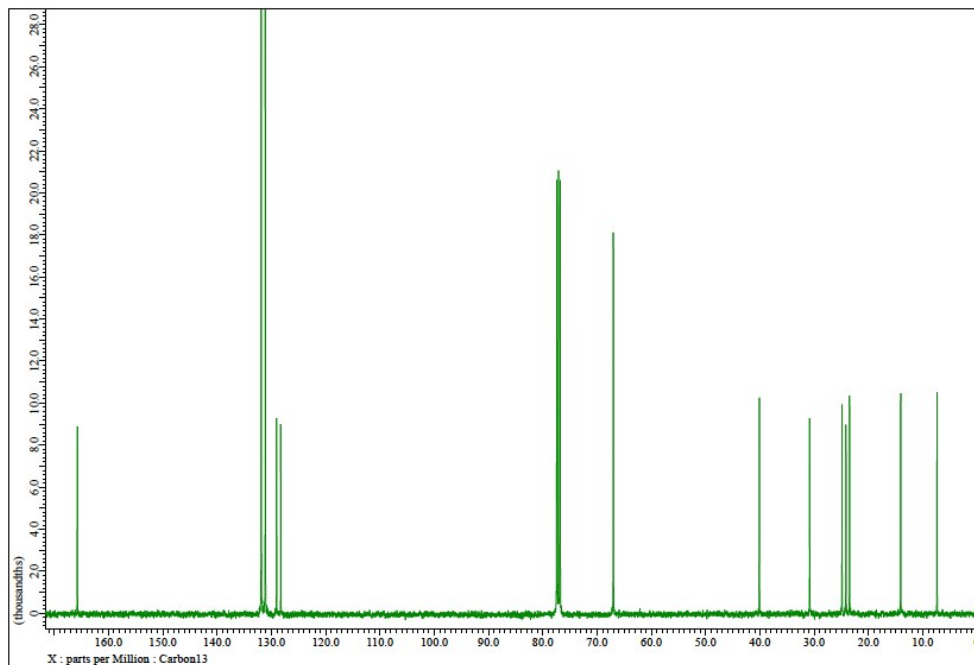

Fig. S6.  $^{13}\text{C}$  NMR spectrum of 3a.

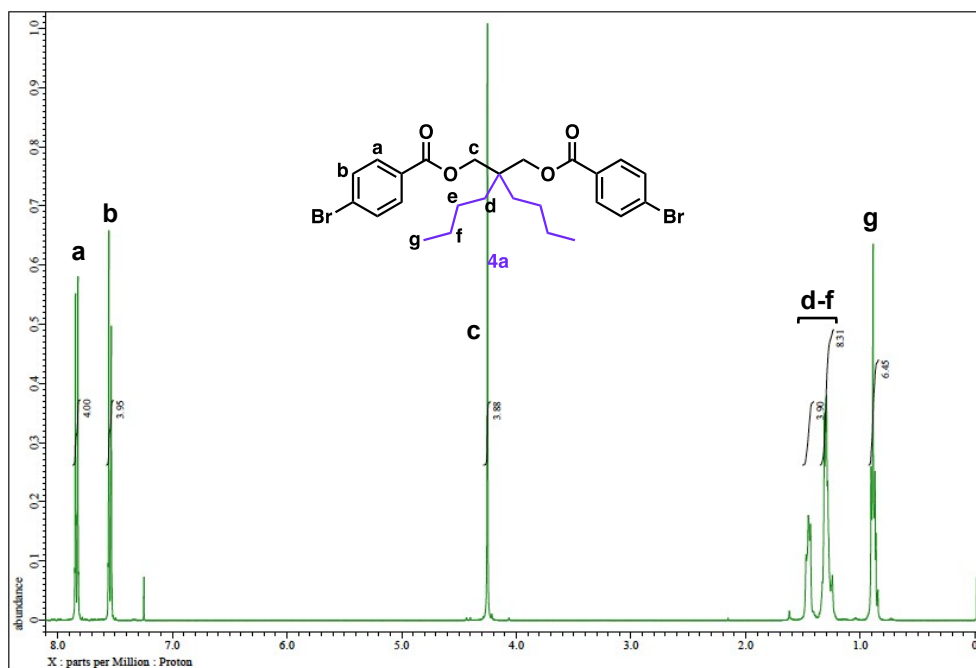

Fig. S7.  $^1\text{H}$  NMR spectrum of 4a.

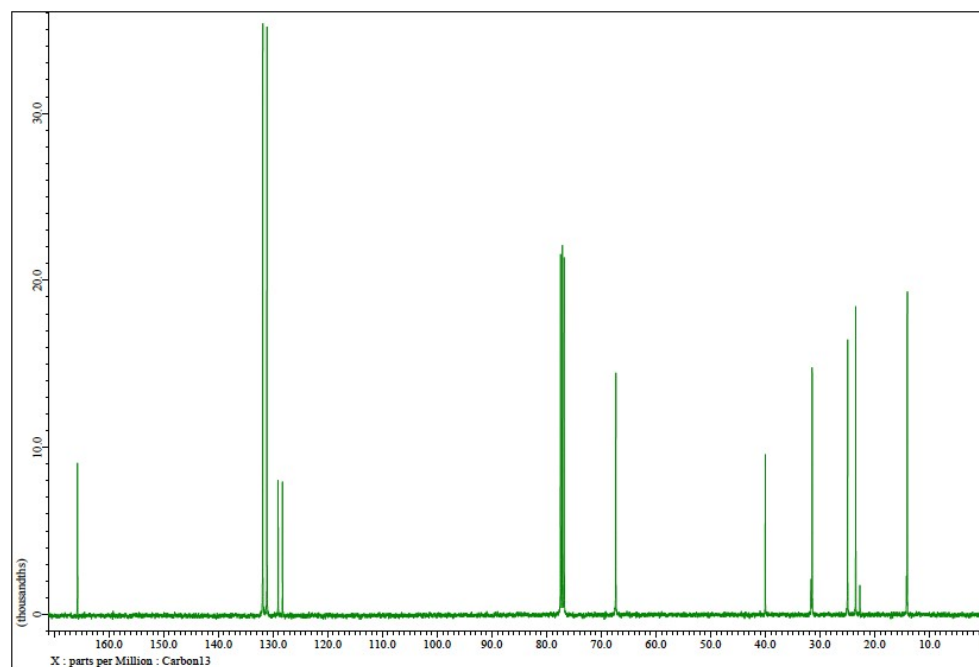

Fig. S8.  $^{13}\text{C}$  NMR spectrum of 4a.

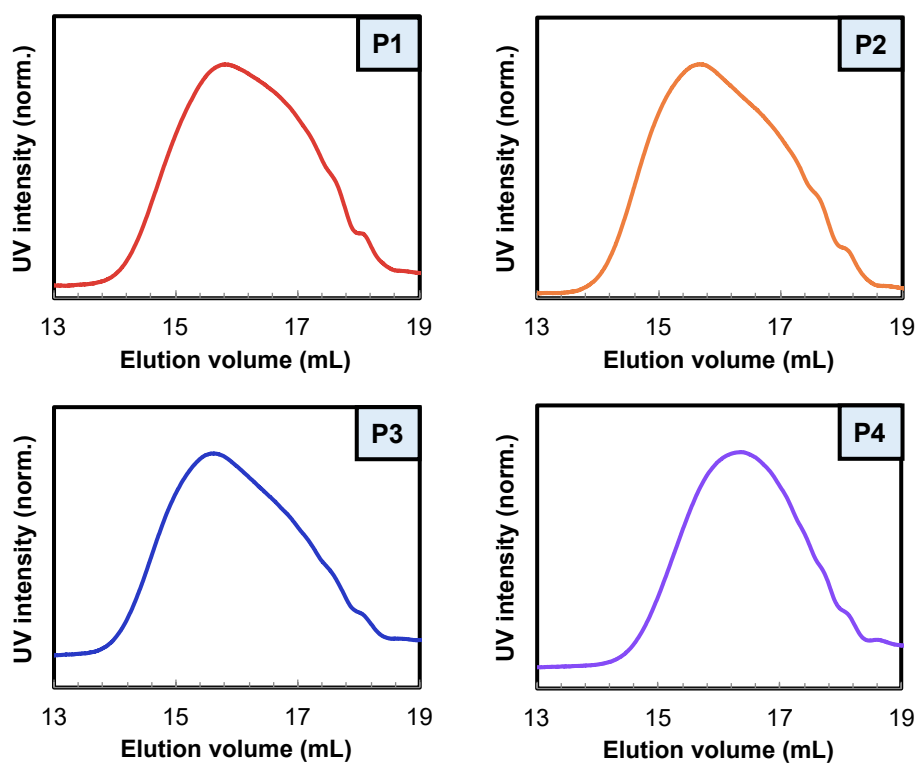

Fig. S9. SEC UV traces of polymers studied.

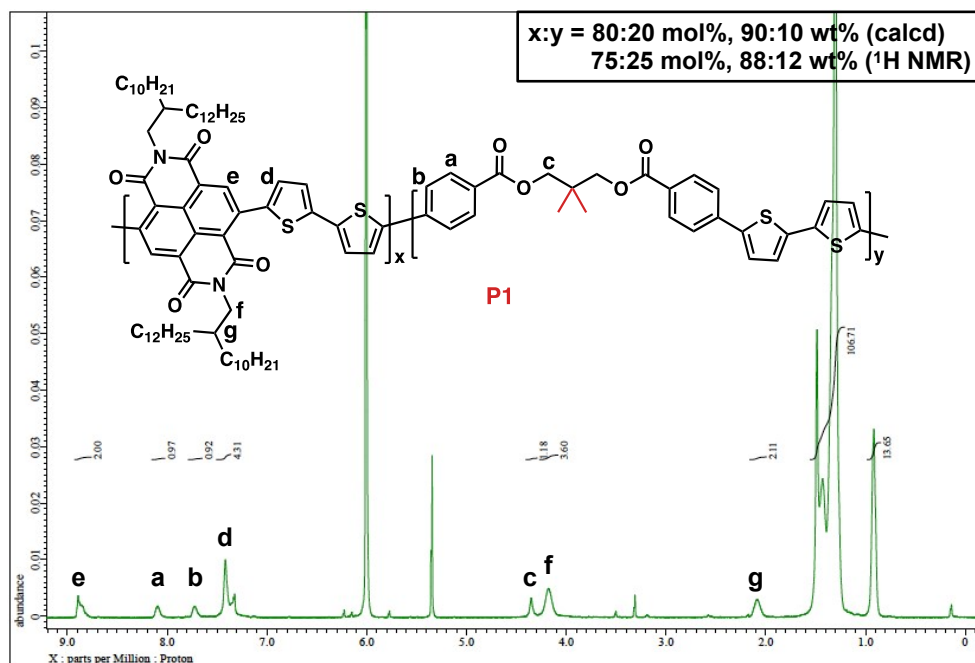

Fig. S10.  $^1\text{H}$  NMR spectrum of P1.

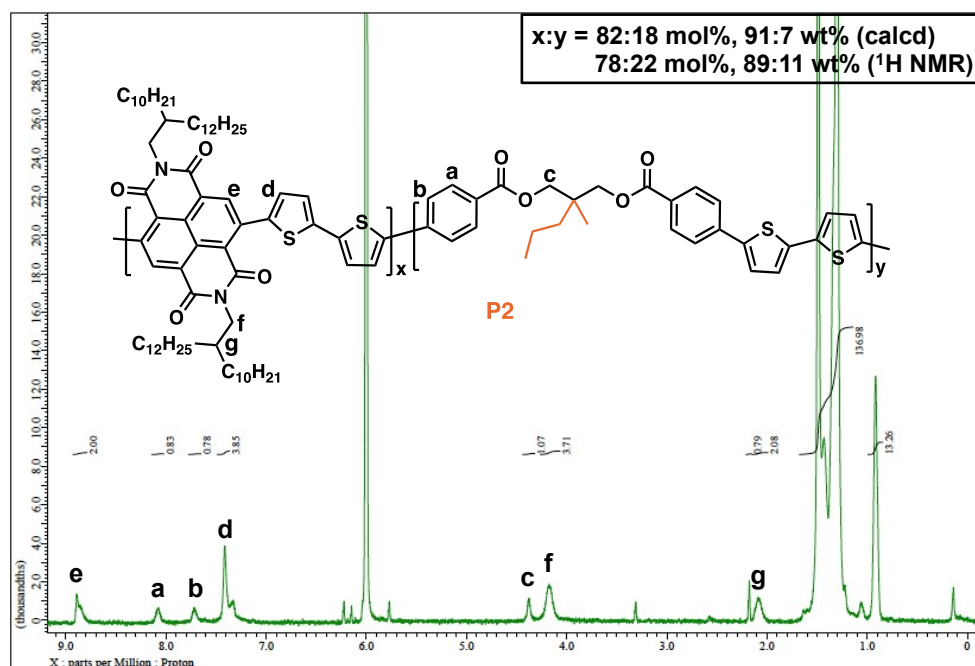Fig. S11. <sup>1</sup>H NMR spectrum of P2.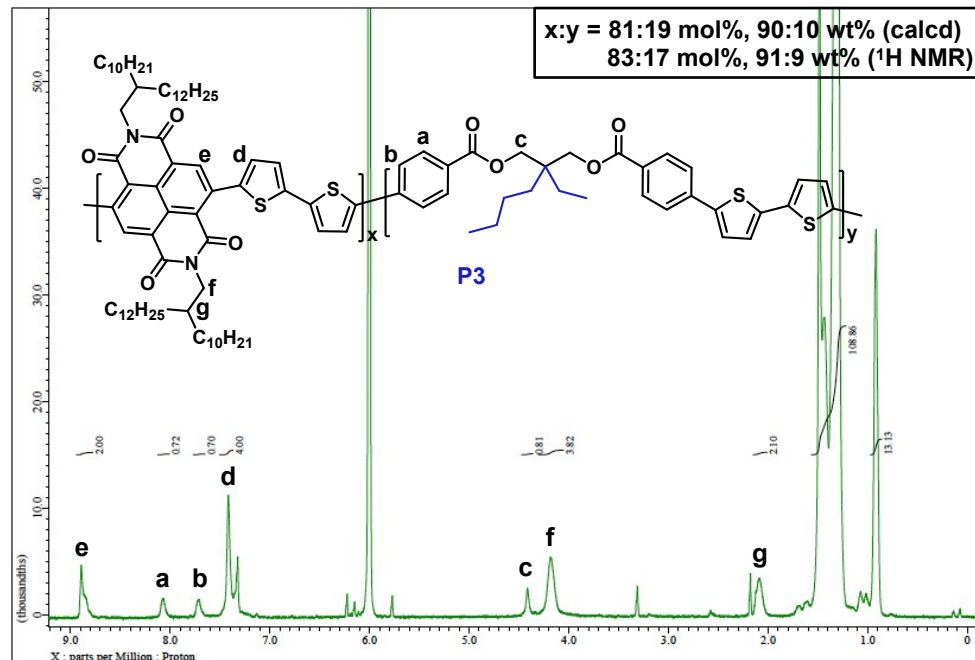Fig. S12. <sup>1</sup>H NMR spectrum of P3.

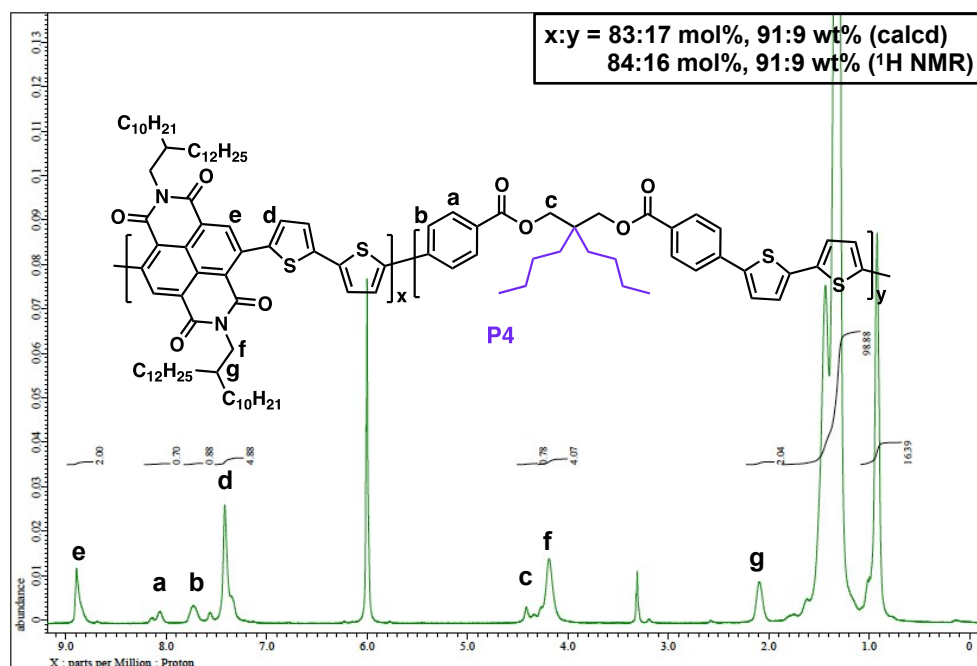Fig. S13.  $^1\text{H}$  NMR spectrum of P4.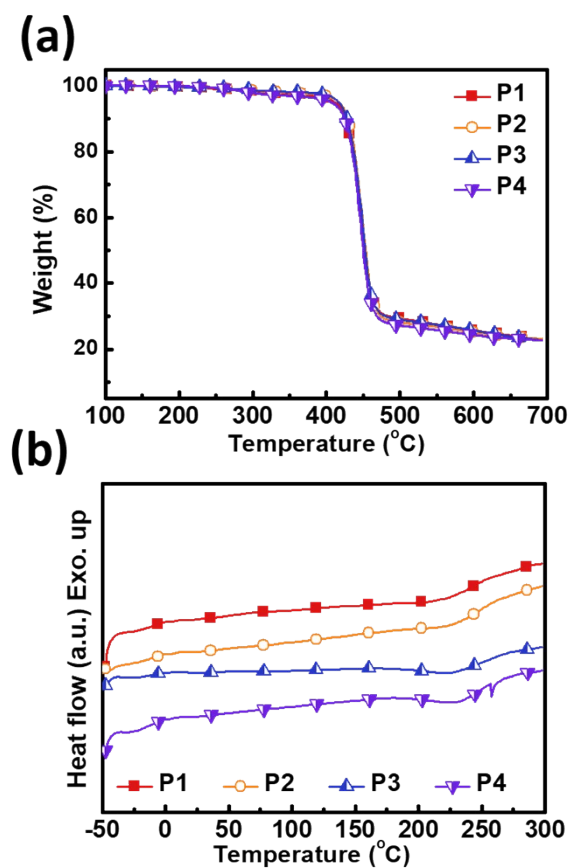

Fig. S14. (a) TGA and (b) DSC thermal histograms of the polymers studied.



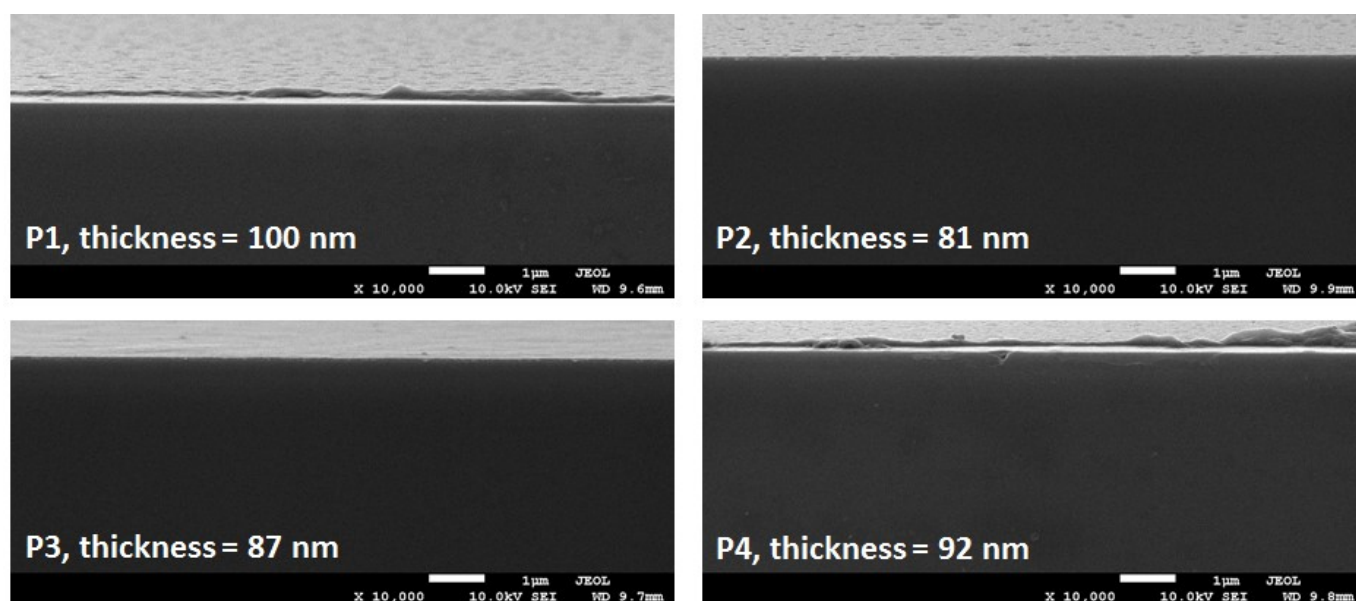

**Fig. S15.** Cross-sectional SEM images of the thermally annealed polymer films on silicon wafers with 300-nm-thick SiO<sub>2</sub> and ODS self-assembled monolayers on the surface.

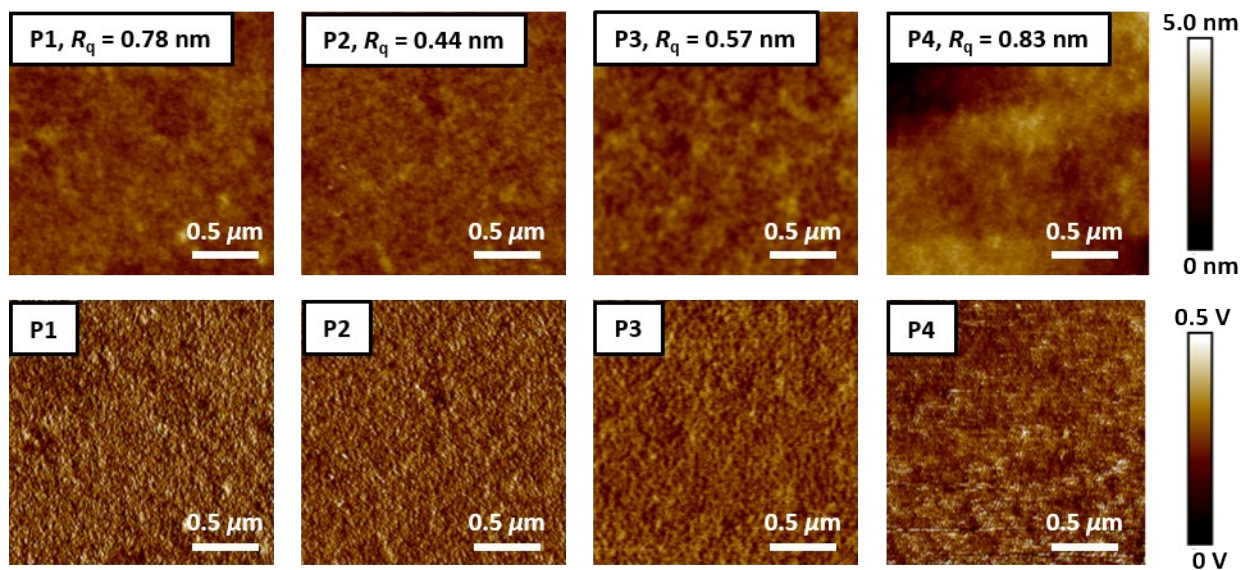

**Fig. S16.** AFM height/phase images of the as-cast polymer films.

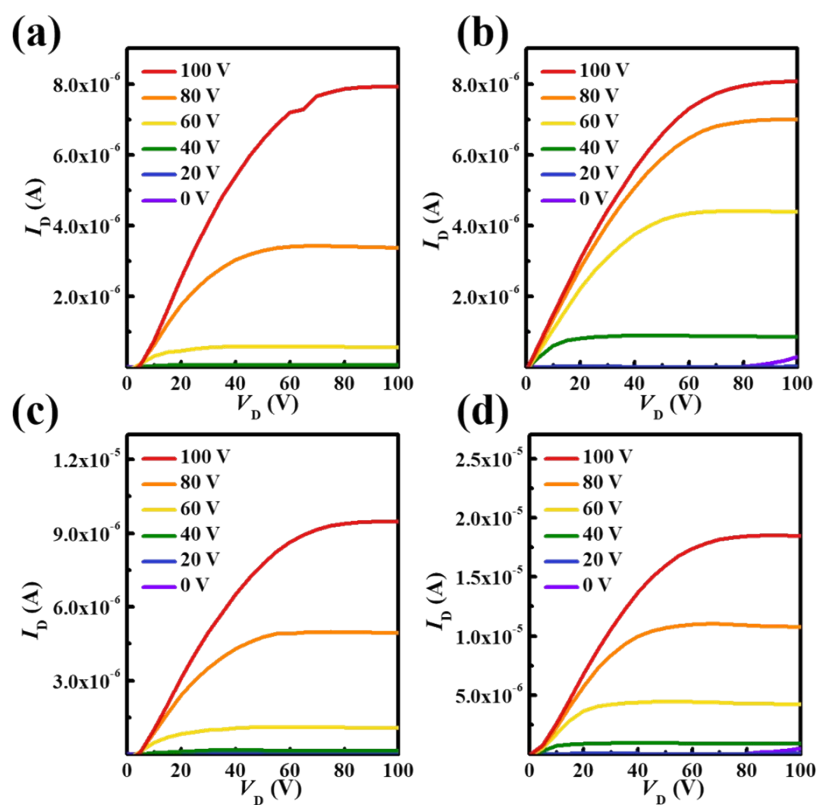

**Fig. S17.** FET output characteristics of the devices with the polymer films of (a) P1 (b) P2 (c) P3 and (d) P4.

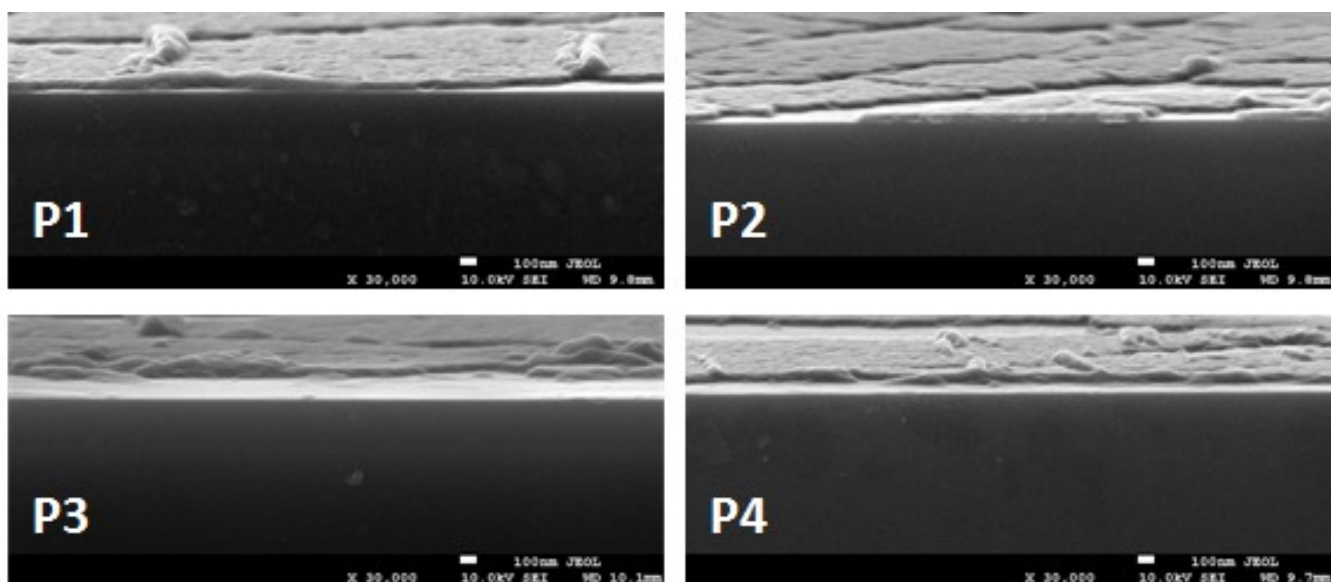

**Fig. S18.** Cross-sectional SEM images of the transferred/stretched polymer films at 60% strain on silicon wafers with 300-nm-thick SiO<sub>2</sub>.

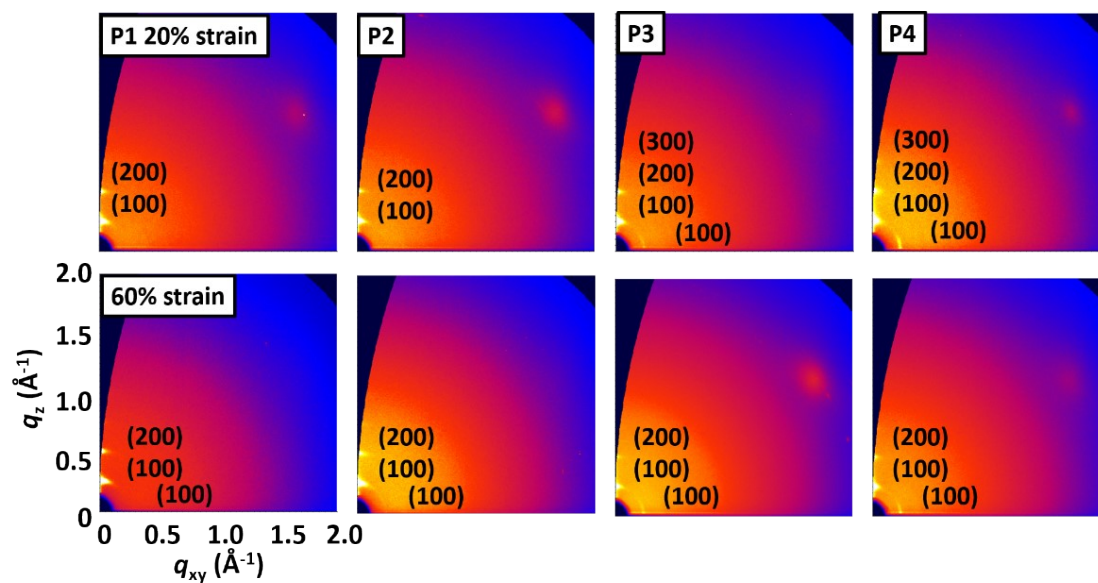

**Fig. S19.** 2D GIXD patterns of the transferred and stretched polymer films with stretching force perpendicular to the incident beam.

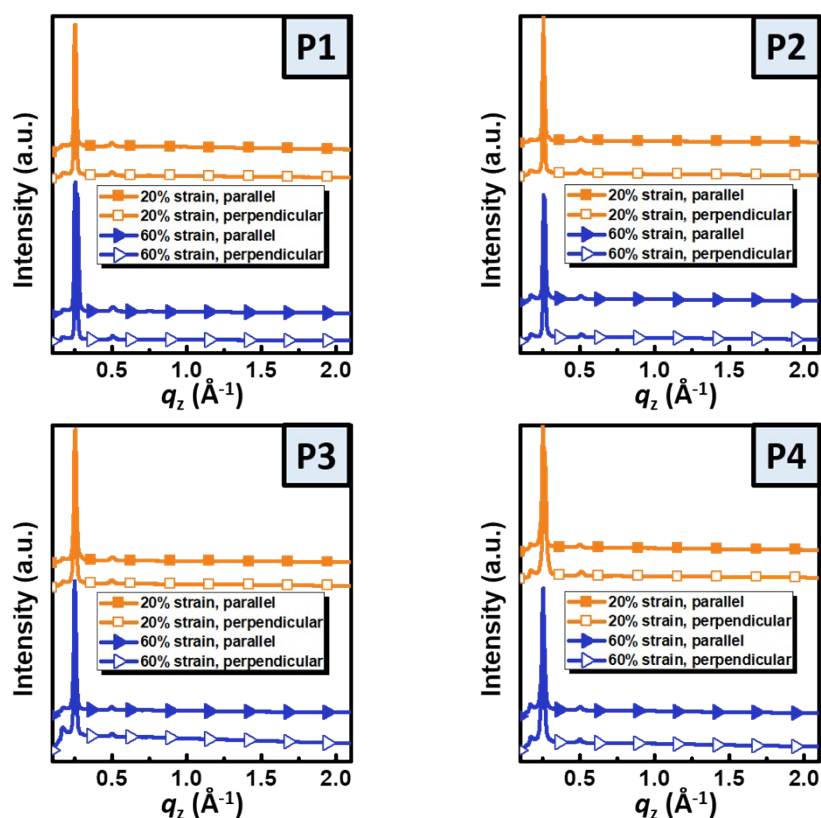

**Fig. S20.** 1D GIXD profiles in the OOP direction of the transferred and stretched polymer films with stretching force parallel/perpendicular to the incident beam.

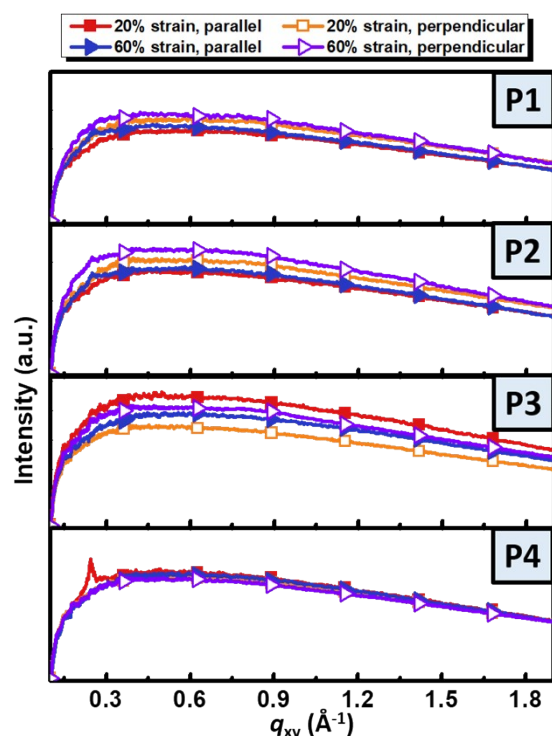

**Fig. S21.** 1D GIXD profiles in the IP direction of the transferred and stretched polymer films with stretching force parallel/perpendicular to the incident beam.

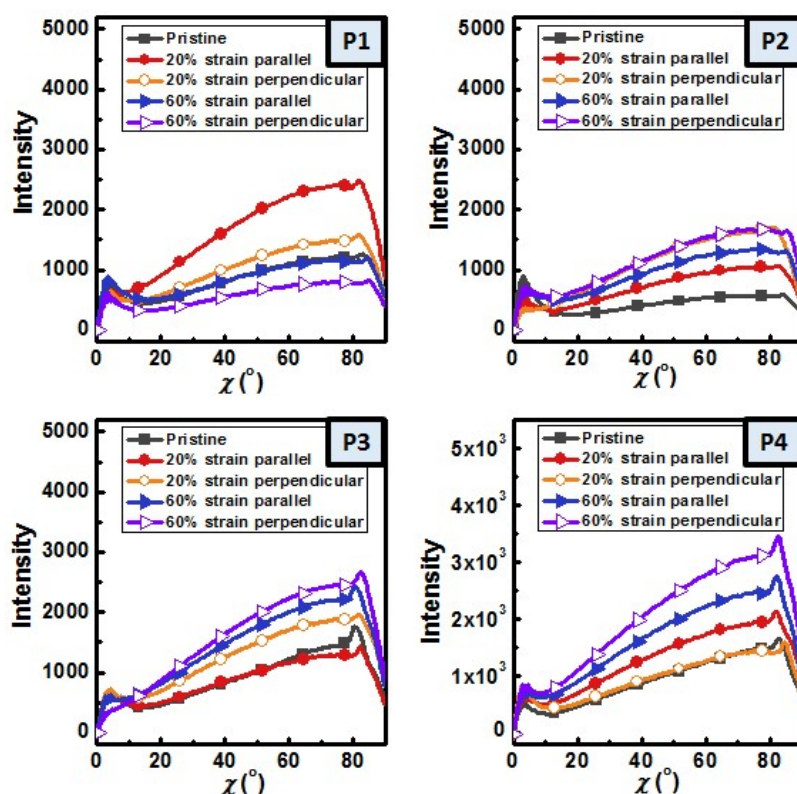

**Fig. S22.** Geometric corrected pole figures of the transferred and stretched polymer films for the evaluation of relative intensity of OOP and IP (100) diffractions. Note that the geometric correction was conducted by multiplying  $\sin(\chi)$  function.

**Table S1.** Relevant crystallographic parameters of the transferred and stretched polymer films. Note that the relative degree of crystallinity (rDOC) was calculated based on OOP (200) diffractions of the films.

| Strain (%) | $d_{\text{lamellar}}$ (Å) |      | IP FWHM (Å <sup>-1</sup> ) |    | IP(100)/OOP(100) |     | rDOC (%) |    |    |
|------------|---------------------------|------|----------------------------|----|------------------|-----|----------|----|----|
|            | 20                        | 60   | 20                         | 60 | 20               | 60  | 20       | 60 |    |
| P1         |                           | 24.6 | 24.6                       | -- | 0.031            | 3.7 | 1.3      | 96 | 91 |
|            | ⊥                         | 24.9 | 24.0                       | -- | --               | 2.4 | 1.3      | 93 | 91 |
| P2         |                           | 24.6 | 24.6                       | -- | 0.029            | 2.0 | 1.8      | 75 | 73 |
|            | ⊥                         | 24.6 | 24.0                       | -- | 0.037            | 4.9 | 2.3      | 70 | 65 |
| P3         |                           | 24.6 | 25.1                       | -- | --               | 2.1 | 3.9      | 79 | 77 |
|            | ⊥                         | 25.1 | 24.6                       | -- | --               | 2.7 | 7.0      | 83 | 74 |
| P4         |                           | 25.1 | 24.9                       | -- | 0.020            | 3.0 | 3.6      | 82 | 72 |
|            | ⊥                         | 24.0 | 25.1                       | -- | --               | 1.9 | 4.1      | 95 | 82 |

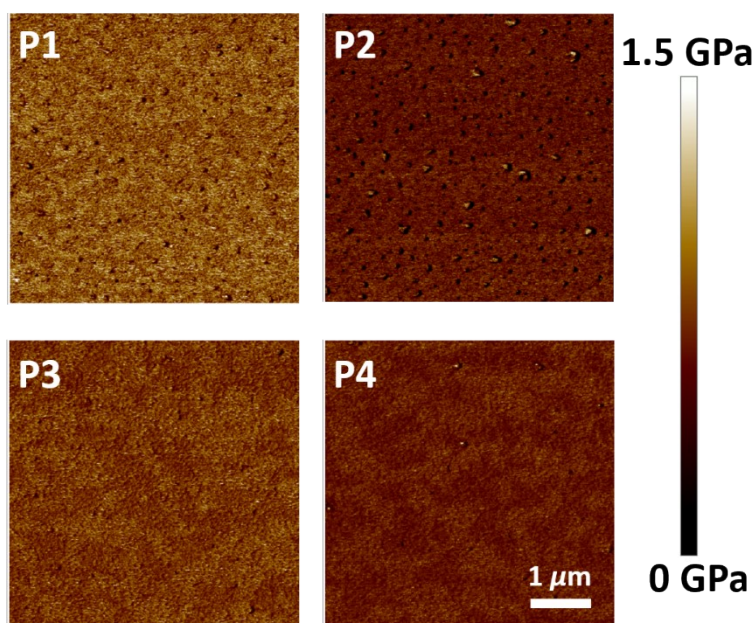

**Fig. S23.** AFM surface mechanical mappings and the elastic modulus evaluated from the DMT model of the polymer films.

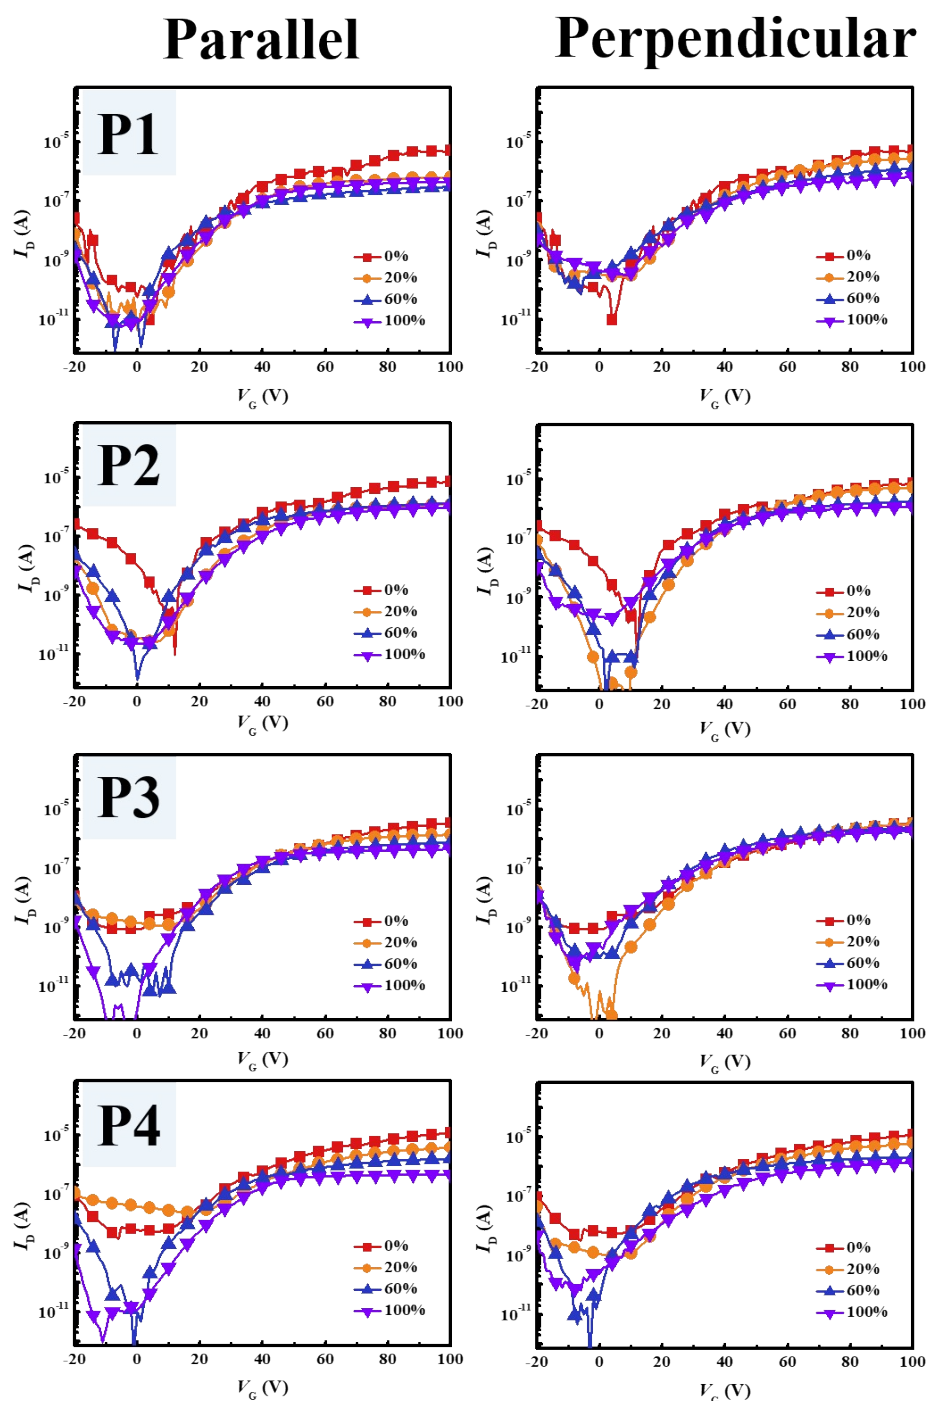

**Fig. S24.** FET transfer characteristics of the transferred and stretched polymer films with different stretching states parallel (left) or perpendicular (right) to the channel direction.

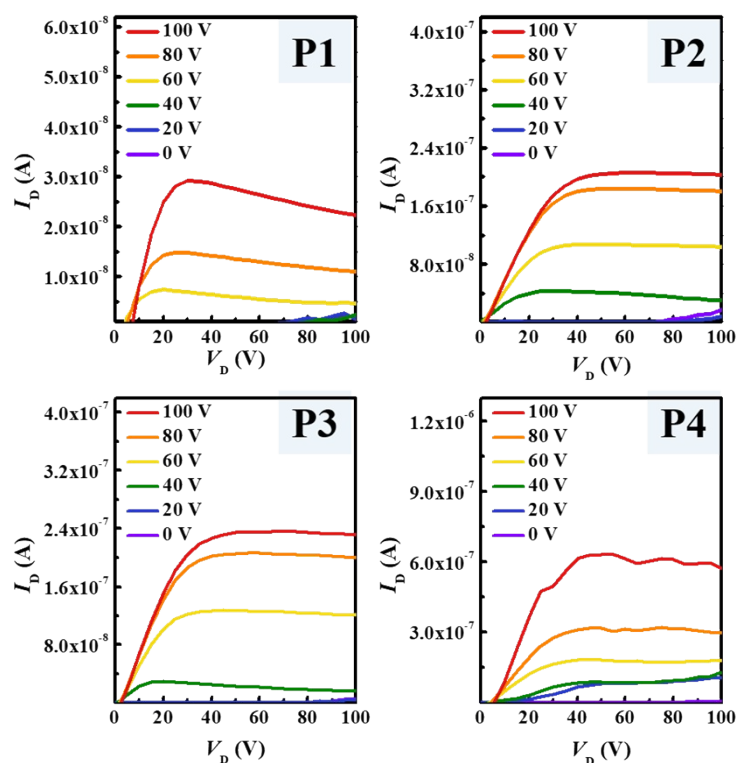

**Fig. S25.** FET output characteristics of the transferred and stretched polymer films with 60% strain perpendicular to the channel direction.

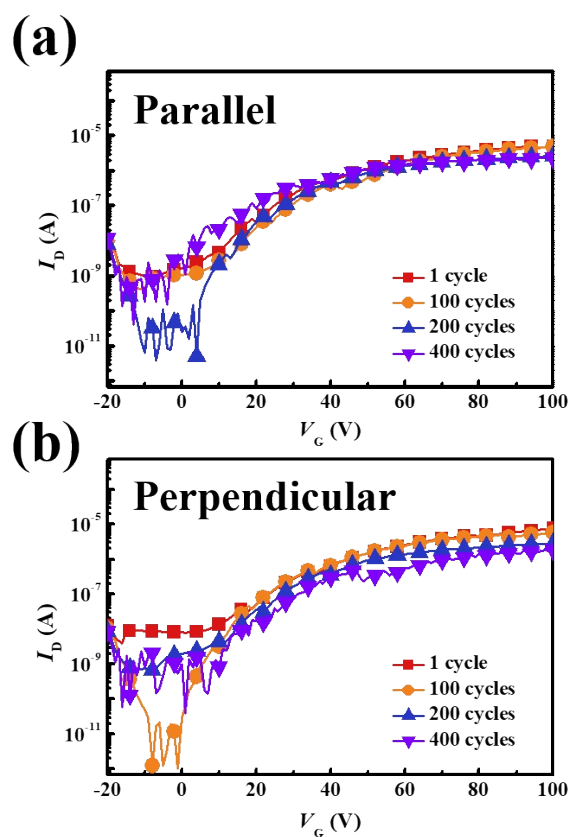

**Fig. S26.** FET transfer characteristics of the transferred and stretched polymer films after different stretching-releasing cycles with 60% strain (a) parallel (b) perpendicular to the channel direction.
